# Supplementary material
Source: MDPI journal article supplement (https://www.mdpi.com/2673-4834/4/2/20)
Supplement: s1 [file s1 › earth-2303441-supplementary.pdf]

# Assessing the Impacts of Current Land Use and Climate Changes and Impacts of Future Climate Changes on River Discharge towards Lake Victoria

Renatus James Shinhu <sup>1,2</sup>, Aloyce I. Amasi <sup>2,\*</sup>, Maarten Wynants <sup>3</sup>, Joel Nobert <sup>4</sup>, Kelvin M. Mtei <sup>2</sup> and Karoli N. Njau <sup>2</sup>

<sup>1</sup> Lake Victoria Basin Water Board (LVBWB), Mwanza P.O. Box 1342, Tanzania

<sup>2</sup> School of Material, Energy, Water and Environmental Science, The Nelson Mandela African Institution of Science and Technology, Arusha P.O. Box 447, Tanzania

<sup>3</sup> Department of Soil and Environment, Swedish University of Agricultural Sciences, Lennart Hjelms väg 9, 75007 Uppsala, Sweden

<sup>4</sup> Institute of Resource Assessment, University of Dar es Salaam, Dar es Salaam P.O. Box 35095, Tanzania

\* Correspondence: aloyce.amasi@nm-aist.ac.tz; Tel.: +255-766-877-920

## Supplementary File S1: Daily, monthly and Annual precipitation in Simiyu catchment

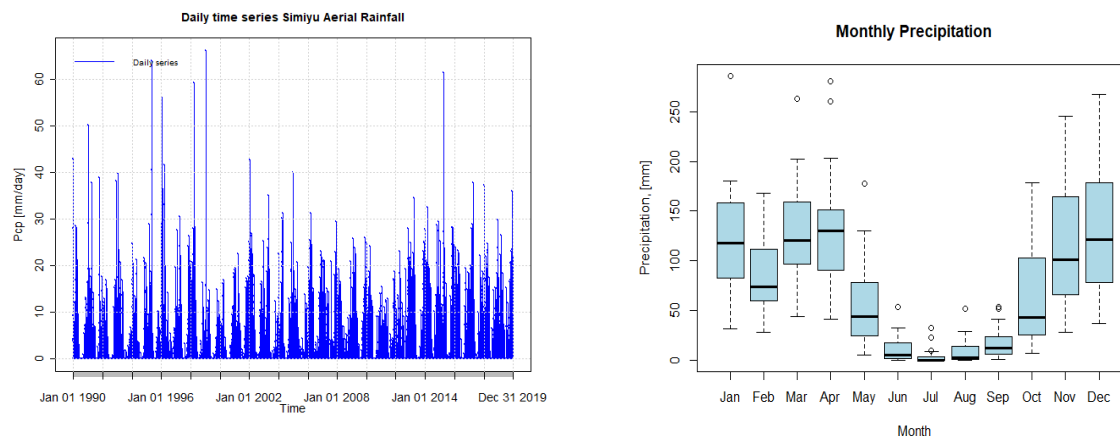

**Figure S1.** On the left is the daily rainfall and the box plot on right represents the monthly precipitation in the Simiyu catchment.

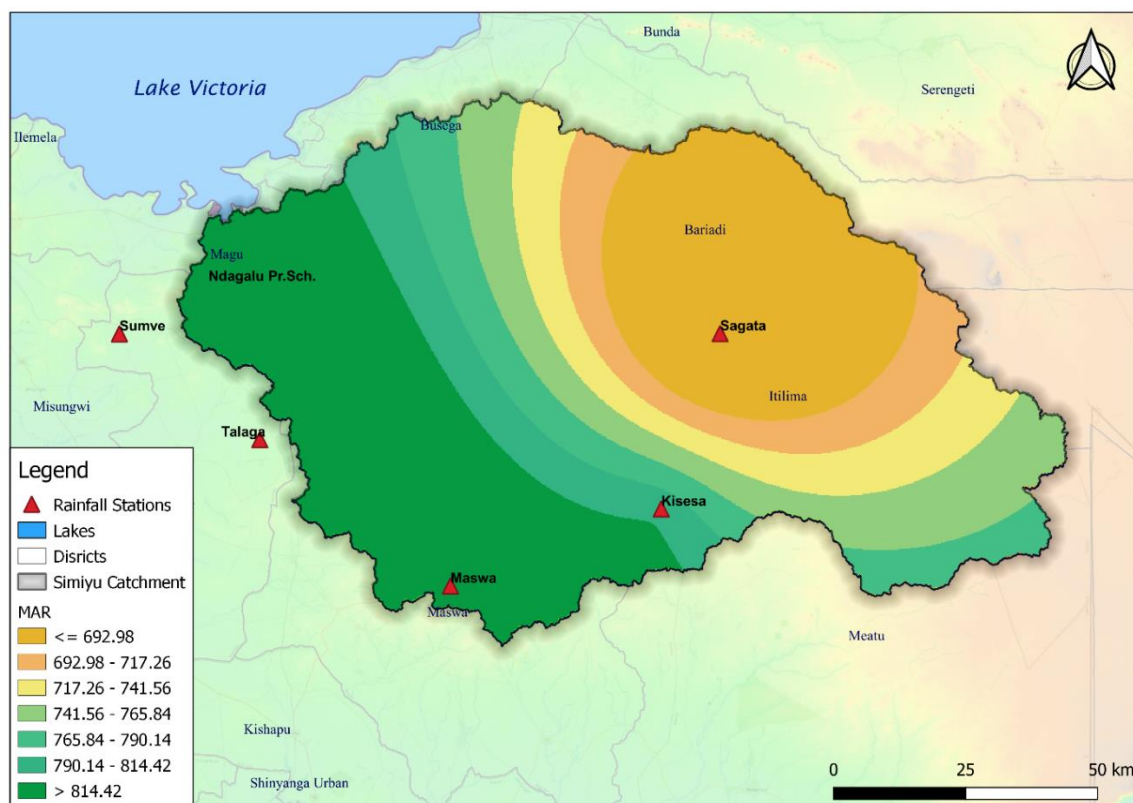

**Figure S2.** Mean Annual Rainfall distribution in Simiyu River Catchment.

### Supplementary File S2: Geology of the Simiyu River catchment

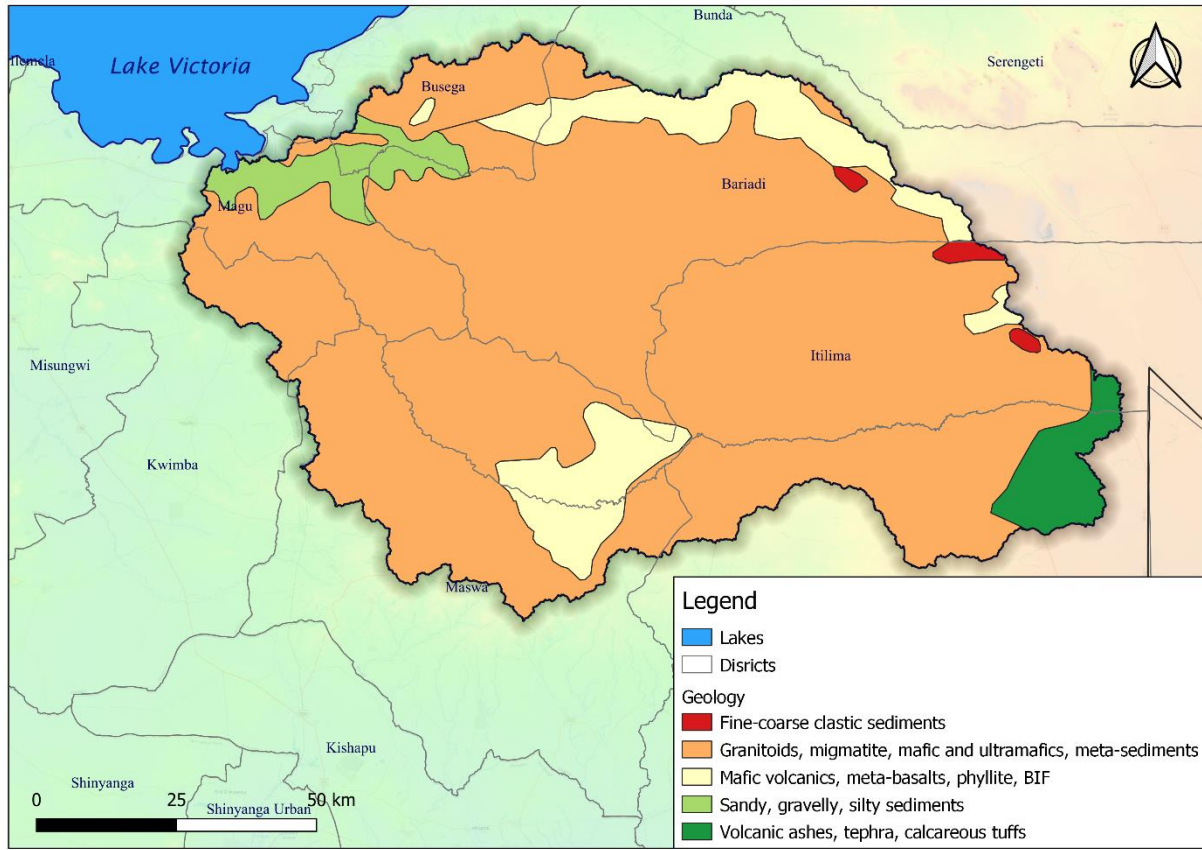

**Figure S2.** Geological characteristics of the Simiyu river catchment.

**Supplementary File S3:** Soil parameters in the SWAT Model database

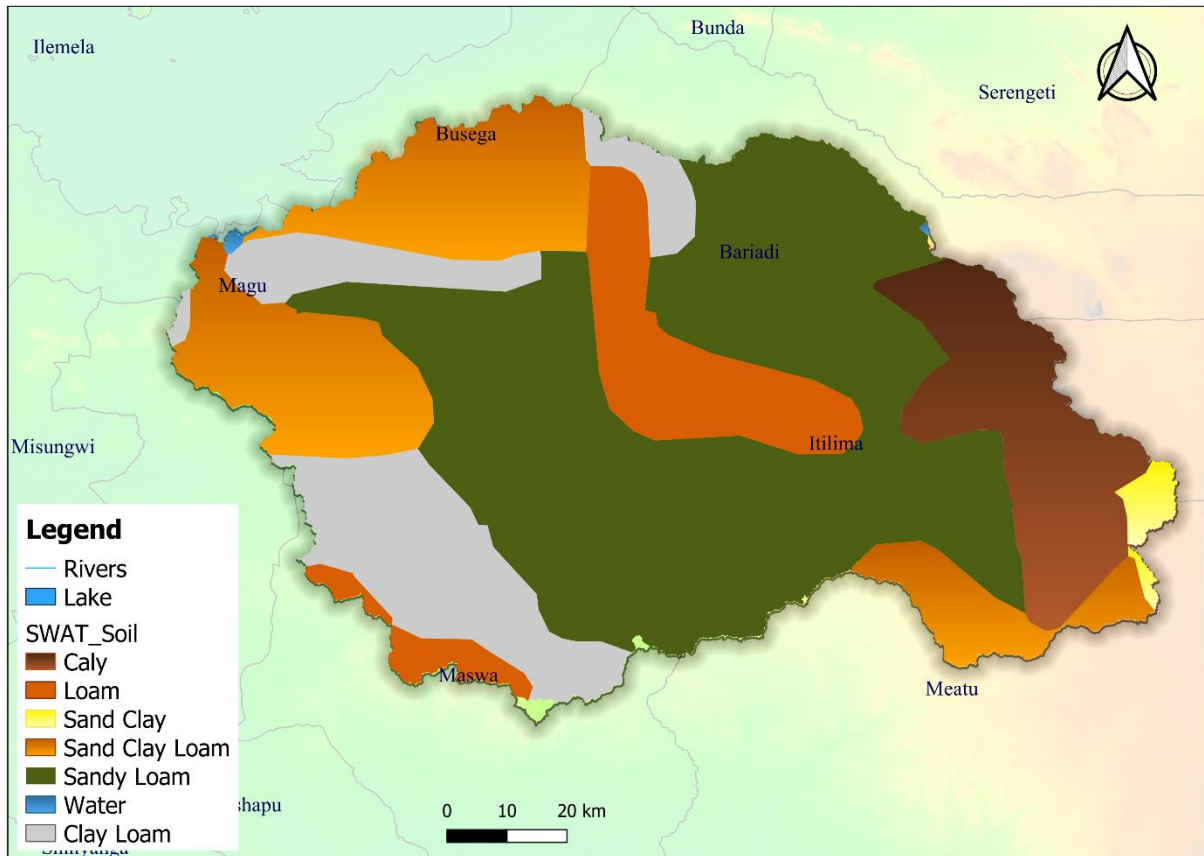

**Figure S3:** Soil types of the Simiyu catchment with their real coverage and (FOA-UNESCO soil classification system

**Supplementary File S4: SWAT soil reclassified map of the study area**

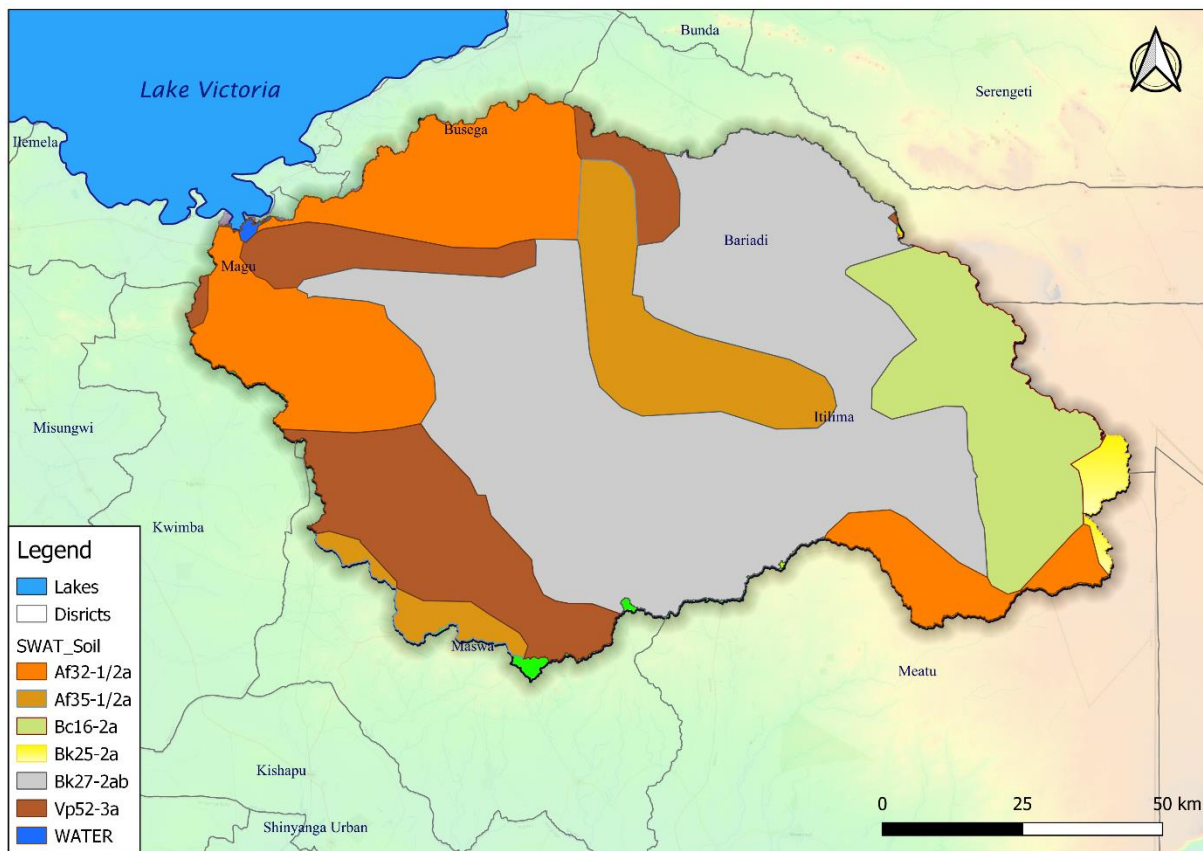

**Figure S4.** SWAT soil reclassified map of the study area.

**Supplementary File S5: Selection of GCM dataset model (2030–2060)**

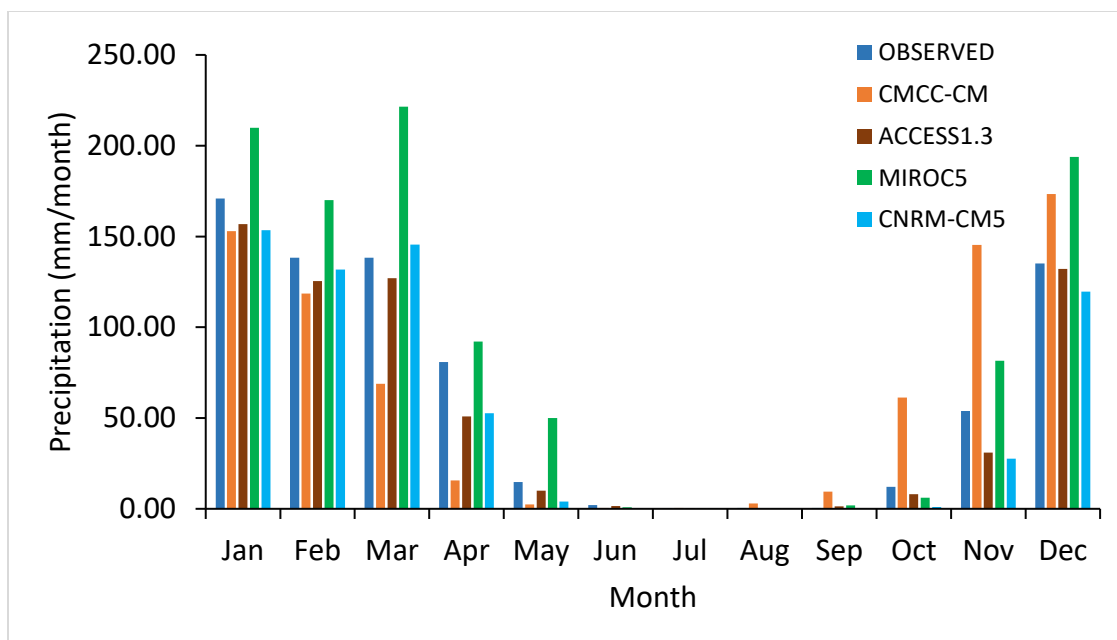

**Figure S5.** General Circulation Models (GCMs) were sourced from the Coupled Model Intercomparison Project 5 (CMIP5).

#### Supplementary File S6: Different emission scenarios

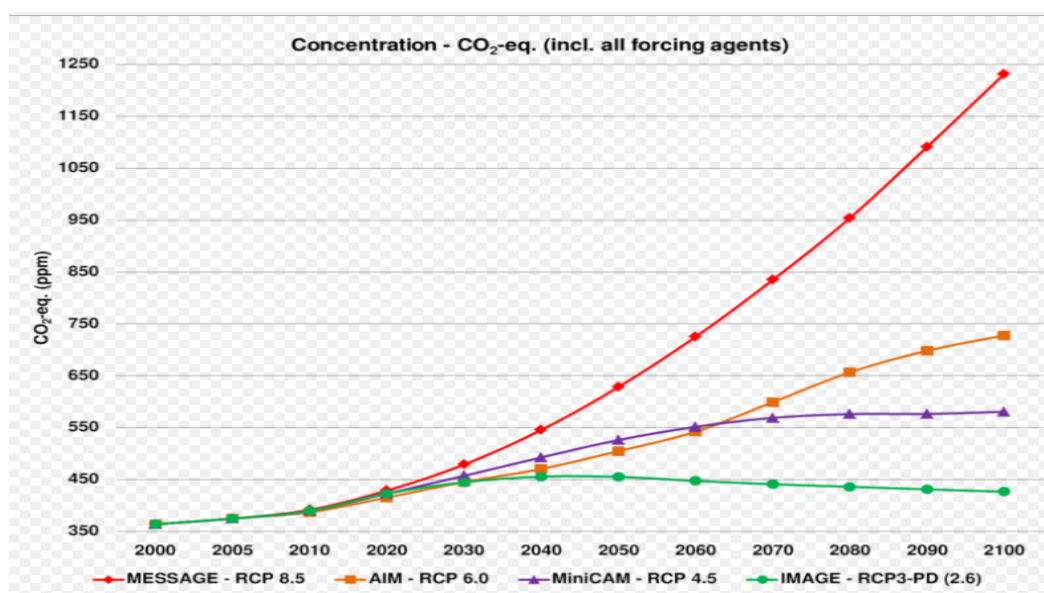

**Figure S6.** Four Representative Concentration Pathway (RCPs) emission scenarios: Source: (IPCC, 2014).
